# Supplementary material for: The electronic structure of the metal–organic interface of isolated ligand coated gold nanoparticles
Source: Royal Society of Chemistry journal article supplement (doi:10.1039/d1na00737h), 2022-01-01
Supplement: d1na00737h1.pdf [file d1na00737h1.pdf]

## Supporting information:

# Electronic structure of the metal-organic interface of isolated ligand coated gold nanoparticles

Robin Schürmann,<sup>a\*</sup> Evgenii Titov,<sup>a</sup> Kenny Ebel,<sup>a</sup> Sergio Kogikoski Jr.,<sup>a</sup> Amr Mostafa,<sup>a</sup> Peter Saalfrank,<sup>a</sup> Aleksandar R. Milosavljević,<sup>b</sup> Ilko Bald<sup>a\*</sup>

<sup>a</sup> University of Potsdam, Institute of Chemistry, 14476 Potsdam, Germany

<sup>b</sup> Synchrotron SOLEIL, 91192 GIF-sur-YVETTE CEDEX, France

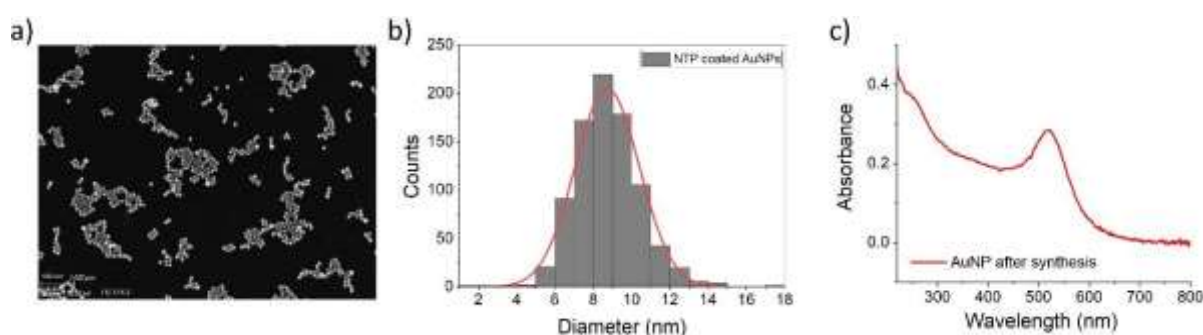

Figure S1: a) SEM image of NTP capped AuNPs on a Si substrate recorded with a Scanning Electron Microscope ZEISS Ultra plus. b) Size distribution of the NTP capped AuNPs determined with ImageJ 1.53e. c) UV-Vis spectrum of the AuNPs after synthesis recorded with a Nanodrop 2000 spectrophotometer (Thermo Scientific).

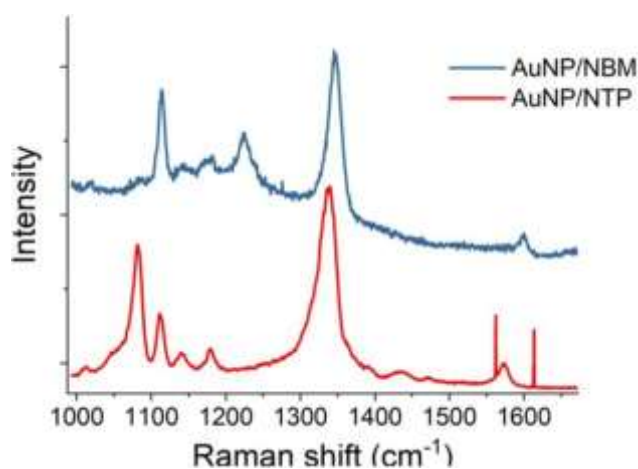

Figure S2: Raman spectra of NTP (red) and NBM (blue) coated AuNPs dried on a Si chip recorded with a Witec Alpha 300 confocal Raman microscope with a 785 nm laser (15 mW) focused with a Nikon 10x Objective (NA = 0.25).

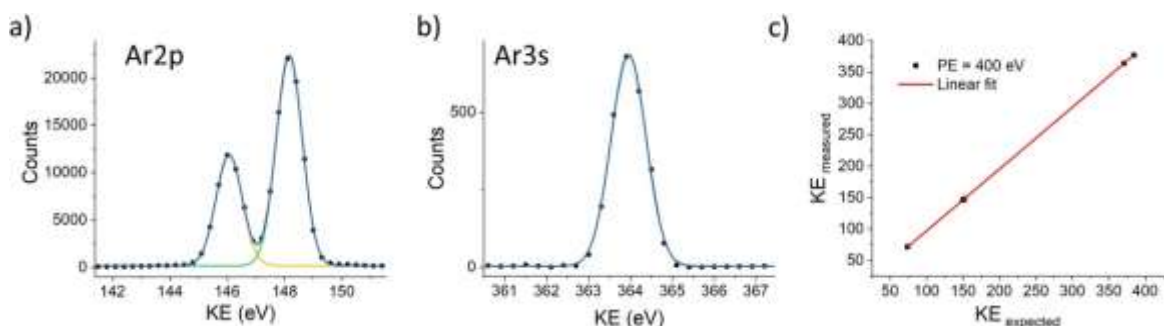

Figure S3: a) Ar2p spectrum recorded at PE= 400 eV. b) Ar3s spectrum recorded at PE= 400 eV. c) Calibration curve for the KE of the photoelectrons based on the 3p, 3s, 2p and 2s signals of the Ar carrier gas.

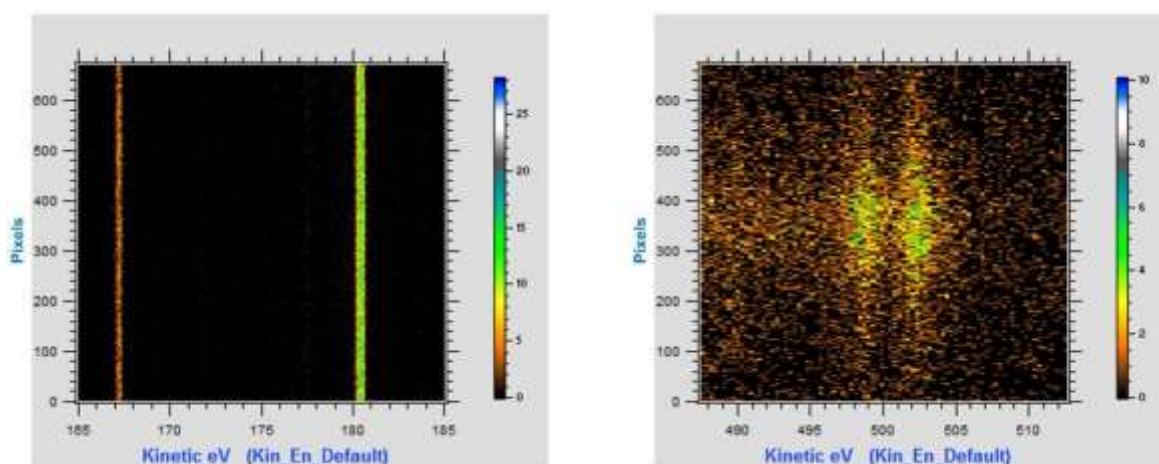

Figure S4: spectra of NTP capped AuNP beam, showing the Ar3s and Ar3p states of the carrier gas recorded at PE = 200 eV (left) and the Au4f states recorded at PE = 600 eV (right). The gas-phase signal and the signal in the center of the detector originating from the focused AuNP-beam can be easily distinguished by the unfocussed gas-molecules. An influence on the KE of the photoelectrons from Ar in the vicinity of the AuNP beam cannot be observed.

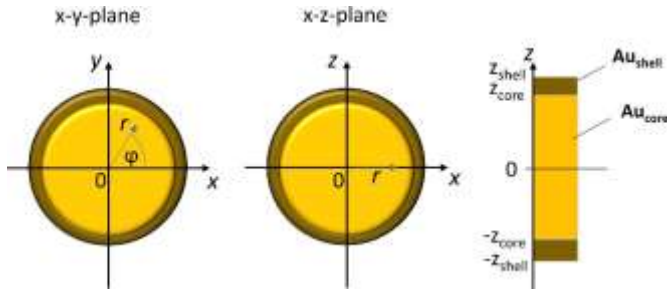

Figure S5: Scheme of an Au-Au core shell NP showing cross-sections along the x-y plane, x-z plane and a slice along the z-axis. The coordinates used in the calculation are presented in the scheme.

The XPS signal  $I_{AuNP}$  of a AuNP with radius  $r_{AuNP}$  is determined by calculating the signal  $I_z$  of a 1-dimensional slice along the z-axis of the AuNP (shown in Figure 3) and integrating over all slices in cylindrical coordinates  $r, \varphi, z$  (shown in Figure S5). Due to the symmetry of the AuNP  $I_z$  is independent of  $\varphi$  and  $I_{AuNP}$  can be written as:

$$I_{AuNP} = \int_0^{r_{AuNP}} \int_0^{2\pi} \int_z r \cdot I(r) dr d\varphi = 2\pi \cdot \int_0^{r_{AuNP}} r \cdot I(r) dr \quad (S1)$$

Using formula (3) the intensity  $I_z(r)$  of a 1-dimensional slice at a radial position  $r$  of an AuNP is given by:

$$I_{z,AuNP}(r) = I_0 \cdot \left(1 - e^{-\frac{2z_{shell}(r)}{\lambda}}\right) \quad (S2)$$

where  $I_0$  is the intensity of an infinitely thick Au-substrate and  $z_{shell}(r) = \sqrt{r_{AuNP}^2 - r^2}$ . In order to differentiate between the contributions of the signal originating from the core  $I_{core}$  and from the shell  $I_{shell}$ , their  $I_z(r)$  are calculated separately. Using equation (3)  $I_{z,core}$  can be written as:

$$I_{z,core} = I_0 \cdot \left( e^{-\frac{z_{shell}(r)-z_{core}(r)}{\lambda}} - e^{-\frac{z_{shell}(r)+z_{core}(r)}{\lambda}} \right) \quad (S3)$$

By combining equation S1 and S3  $I_{core}$  is given by:

$$I_{core} = 2 \cdot \pi \cdot \int_0^{r_{AuNP}} r \cdot \left( e^{-\frac{z_{shell}(r)-z_{core}(r)}{\lambda}} - e^{-\frac{z_{shell}(r)+z_{core}(r)}{\lambda}} \right) dr \quad (S4)$$

Consequently, with  $I_{AuNP} = I_{core} + I_{shell}$  and equation (S4) an expression for  $I_{shell}$  is obtained.

$$I_{shell} = 2 \cdot \pi \cdot I_0 \int_0^{r_{AuNP}} r \cdot \left( 1 - e^{-\frac{z_{shell}(r)-z_{core}(r)}{\lambda}} + e^{-\frac{z_{shell}(r)+z_{core}(r)}{\lambda}} - e^{-\frac{2z_{shell}(r)}{\lambda}} \right) dr \quad (S5)$$

Since only the relative intensities of  $I_{core}$  and  $I_{shell}$  are relevant for the interpretation of the experimental XPS-data, the intensities in the equations (4) and (5) are normalized by  $I_0$ .

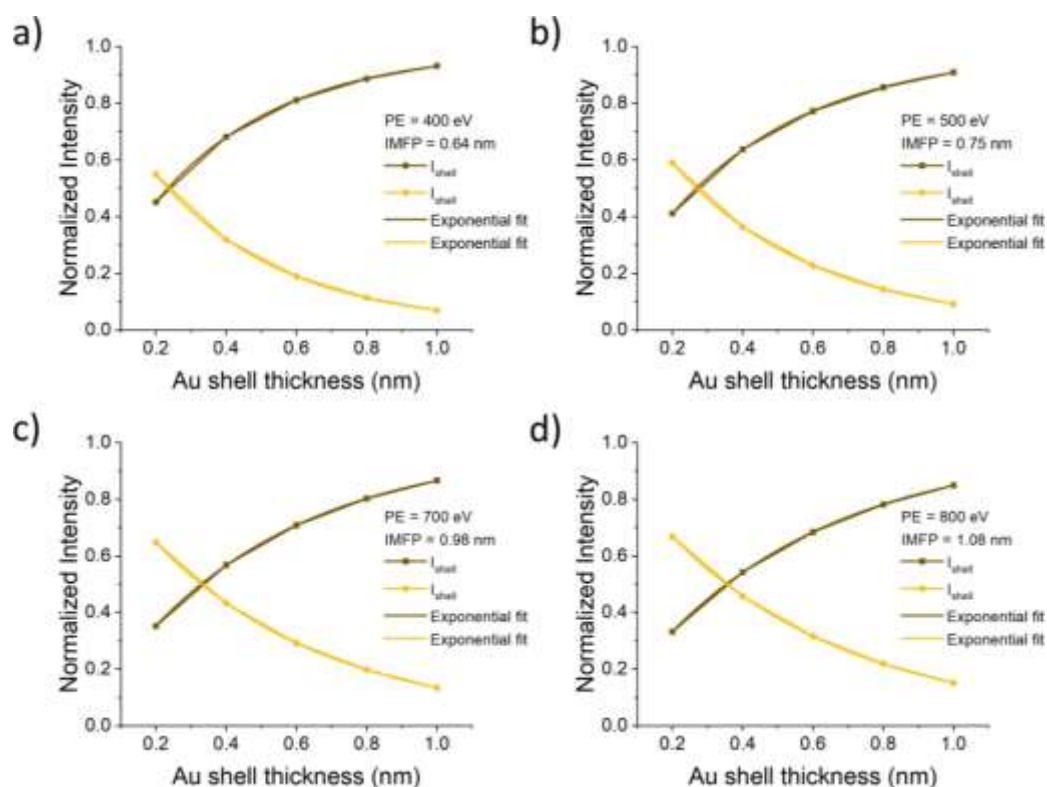

Figure S6: Calculated XPS signal intensities for  $Au_{shell}$  and  $Au_{core}$  of 10 nm AuNPs for different Au shell thickness and inelastic mean free paths (IMFP) of the photoelectrons, namely 0.64 nm (a), 0.75 nm (b), 0.98 nm (c), 1.08 nm (d).

Table S1: Au 4f orbital shifts "gold – complex" in eV calculated at the B3LYP/TZVP+ANO-R level of theory. Note that the orbital energies are negative and, hence, positive shifts correspond to downward orbital shifts. All considered systems are neutral.

|     | Au <sub>1</sub> | Au <sub>2</sub> | Au <sub>10</sub> |
|-----|-----------------|-----------------|------------------|
| NTP | 1.279           | 0.928           | 0.357            |
| NBM | 0.972           | 0.714           | 0.321            |

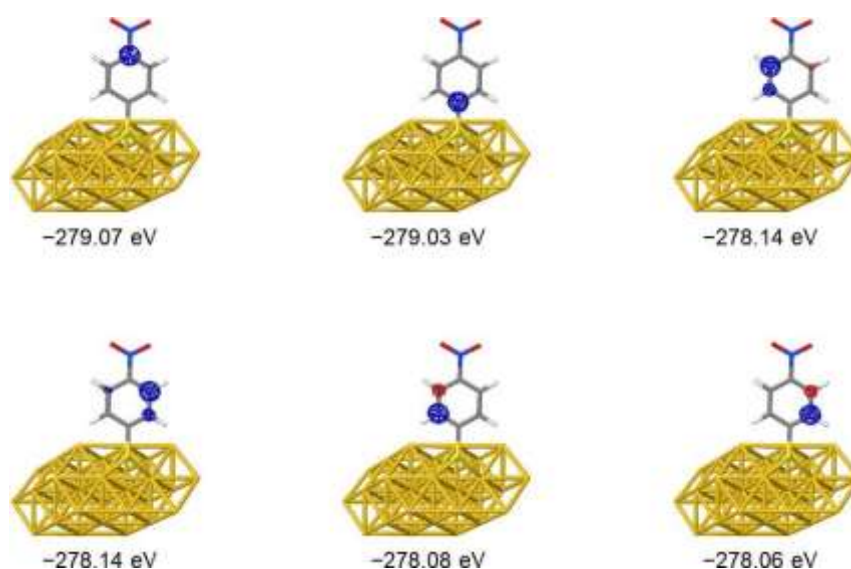

Figure S7: C 1s orbitals and orbital energies for the  $\text{Au}_{30}$ -NTP complex calculated at the B3LYP/TZVP+LANL2TZ(f) level of theory.

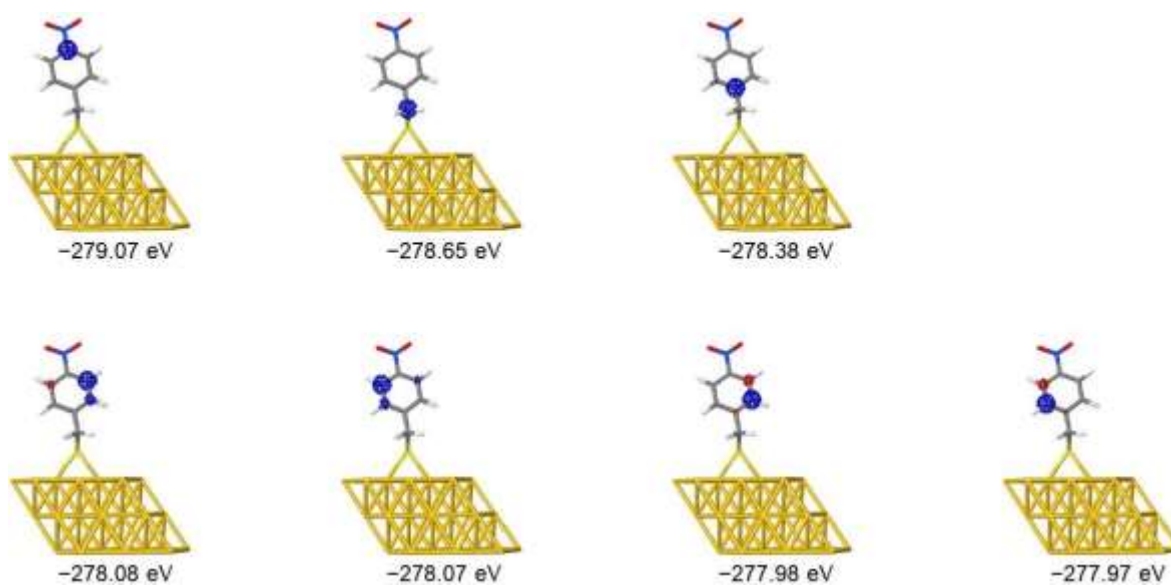

Figure S8: C 1s orbitals and orbital energies for the  $\text{Au}_{30}$ -NBM complex calculated at the B3LYP/TZVP+LANL2TZ(f) level of theory.
